# Supplementary material for: Allogenic Fc Domain-Facilitated Uptake of IgG in Nasal Lamina Propria: Friend or Foe for Intranasal CNS Delivery?
Source: PubMed Central journal article supplement (PMC6161100; doi:10.3390/pharmaceutics10030107), 2018-07-26
Supplement: pharmaceutics-10-00107-s001.pdf [file pharmaceutics-10-00107-s001.pdf]

## Supplementary Materials: Allogenic Fc - Domain Facilitated Uptake of IgG in Nasal Lamina Propria: Friend or Foe for Intranasal CNS Delivery?

Simone Ladel, Johannes Flamm, Arghavan Soleimani Zadeh, Dorothea Filzwieser, Julia-Christina Walter, Patrick Schlossbauer, Ralf Kinscherf, Katharina Lischka, Harald Luksch and Katharina Schindowski

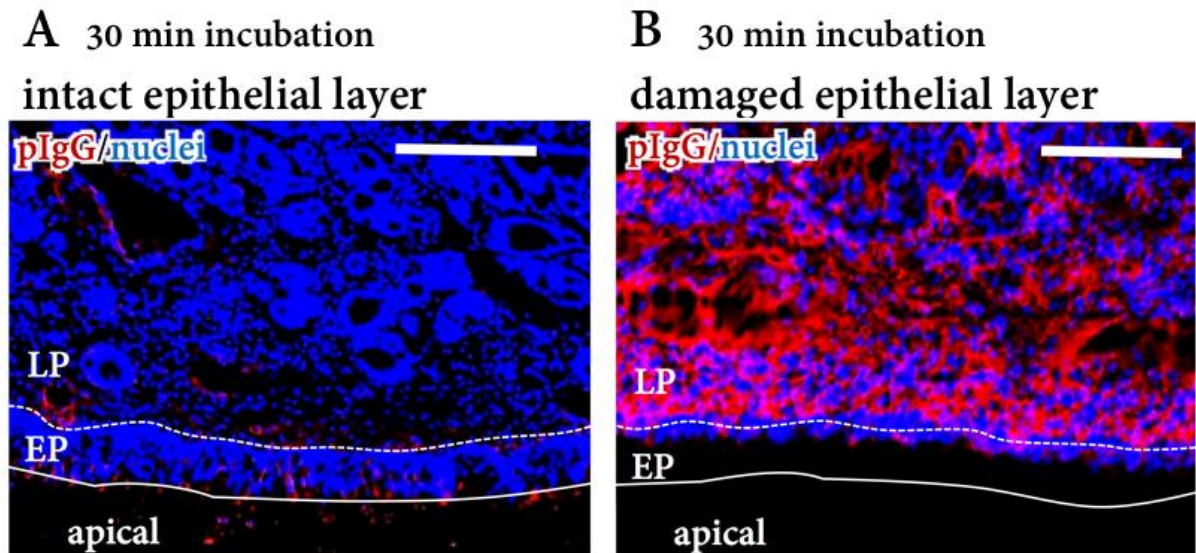

**Figure S1.** Influence of damaged epithelial layer on the experimental readout. (A) While only small amounts of exogenous IgG can cross the epithelial barrier within 30 min of incubation, (B) a loss of the epithelial layer that may occur during the specimen preparation or during the experimental procedure results in a massive penetration within the same incubation time.
